# Supplementary material for: Collectivity in ionic liquids: a temperature dependent, polarizable molecular dynamics study
Source: Royal Society of Chemistry journal article supplement (doi:10.1039/d2cp00898j), 2022-01-01
Supplement: d2cp00898j1.pdf [file d2cp00898j1.pdf]

# Collectivity in ionic liquids: A temperature dependent, polarizable molecular dynamics study

## Supplementary Information

András Szabadi,<sup>a</sup> Philipp Honegger,<sup>a</sup> Flora Schöfbeck,<sup>a</sup> Marion Sappl,<sup>a</sup> Esther Heid,<sup>a</sup> Othmar Steinhauser<sup>a</sup> and Christian Schröder<sup>\*a</sup>

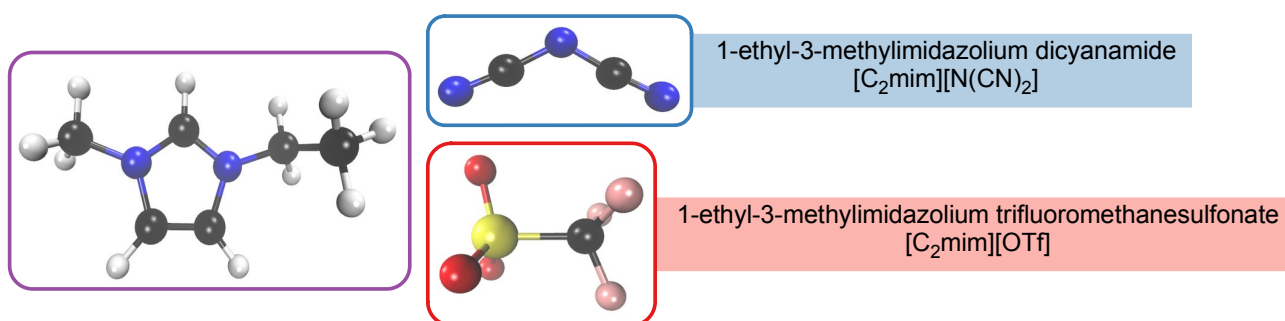

Figure S1: The two ionic liquids investigated in the frame of this study,  $[C_2mim]N(CN)_2$  and  $[C_2mim]OTf$ , modelled fully atomistically and polarizable.

## Contents

|                                                                                             |           |
|---------------------------------------------------------------------------------------------|-----------|
| <b>1 Structural features</b>                                                                | <b>2</b>  |
| 1.1 Temperature dependence of the Voronoi volumes . . . . .                                 | 2         |
| 1.2 Coordination numbers and potential of mean force . . . . .                              | 4         |
| <b>2 Dynamics</b>                                                                           | <b>6</b>  |
| 2.1 Transport properties . . . . .                                                          | 6         |
| 2.2 Molecular rotational relaxation . . . . .                                               | 8         |
| 2.3 Collective rotational relaxation . . . . .                                              | 9         |
| 2.3.1 Contributions to the dielectric spectrum . . . . .                                    | 9         |
| 2.3.2 Alternative decomposition of the collective rotational correlation function . . . . . | 10        |
| 2.4 Arrhenius prefactors . . . . .                                                          | 11        |
| <b>3 Input scripts</b>                                                                      | <b>12</b> |
| 3.1 Topology . . . . .                                                                      | 12        |
| 3.2 Parameters . . . . .                                                                    | 17        |
| 3.3 Dynamics . . . . .                                                                      | 22        |

# 1 Structural features

Voronoi tessellation constructs space-filling polyhedra around each molecule in the simulation box at each timestep. For example, an exemplary polyhedron around a  $\text{N}(\text{CN})_2^-$ -anion is shown in Fig. S2. Each molecule sharing a surface with the red polyhedron is a first neighbor of the central molecule and belongs to the first shell  $s = 1$ . The outer surface of all these molecules is depicted as a turquoise area in Fig. S3 and is a picture of the ion cage around the central  $\text{N}(\text{CN})_2^-$ -anion. In addition to the nice pictures, Voronoi analysis provides much more information on the system as discussed below.

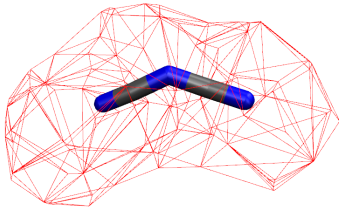

Figure S2: Voronoi surface (wire-frame) of a  $\text{N}(\text{CN})_2^-$  ion (nearest neighbors not shown)

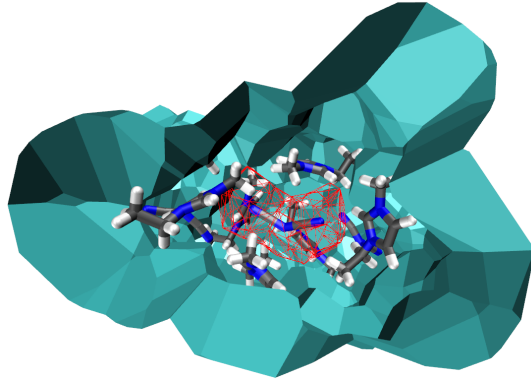

Figure S3: Voronoi surface of the first contact shell (blue) of a central  $\text{N}(\text{CN})_2^-$  ion

## 1.1 Temperature dependence of the Voronoi volumes

The molecular volumes obtained from the Voronoi polyhedra in Table S1 show a linear dependence on temperature as depicted in Fig. S4.

Table S1: Average Voronoi volume of the zeroth and first shells

|                                        | T / K | $V^\oplus(s=0) / \text{\AA}^3$ | $V^\ominus(s=0) / \text{\AA}^3$ | $V^\oplus(s=1) / \text{\AA}^3$ | $V^\ominus(s=1) / \text{\AA}^3$ |
|----------------------------------------|-------|--------------------------------|---------------------------------|--------------------------------|---------------------------------|
| [C <sub>2</sub> mim]N(CN) <sub>2</sub> | 260   | 199                            | 66                              | 2830                           | 1696                            |
|                                        | 280   | 201                            | 67                              | 2866                           | 1718                            |
|                                        | 300   | 203                            | 68                              | 2905                           | 1740                            |
|                                        | 320   | 206                            | 69                              | 2954                           | 1768                            |
|                                        | 340   | 209                            | 70                              | 2996                           | 1793                            |
| [C <sub>2</sub> mim]OTf                | 260   | 189                            | 120                             | 2797                           | 2100                            |
|                                        | 280   | 191                            | 121                             | 2832                           | 2128                            |
|                                        | 300   | 194                            | 123                             | 2872                           | 2160                            |
|                                        | 320   | 197                            | 125                             | 2917                           | 2195                            |
|                                        | 340   | 199                            | 126                             | 2965                           | 2231                            |

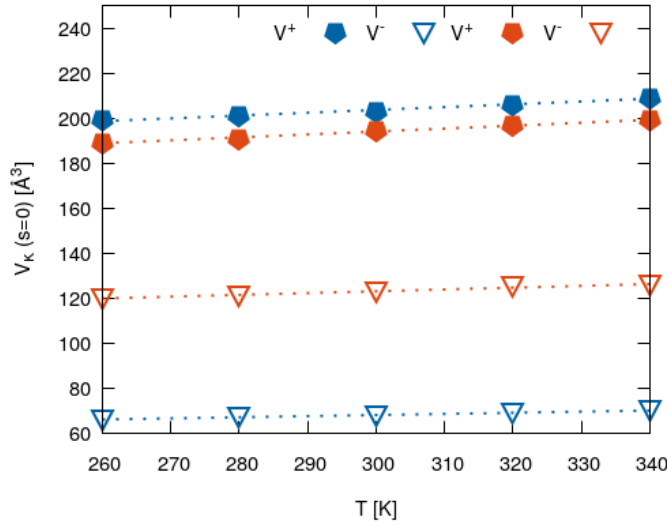

| system                                  | ion $\kappa$                    | $V_{\kappa}^0$<br>[ $\text{\AA}^3$ ] | $\Delta V_{\kappa}$<br>[ $\text{\AA}^3/\text{K}$ ] |
|-----------------------------------------|---------------------------------|--------------------------------------|----------------------------------------------------|
| [C <sub>2</sub> mim] N(CN) <sub>2</sub> | C <sub>2</sub> mim <sup>+</sup> | 166.1                                | 0.125                                              |
|                                         | N(CN) <sub>2</sub> <sup>-</sup> | 53.0                                 | 0.050                                              |
| [C <sub>2</sub> mim] OTf                | C <sub>2</sub> mim <sup>+</sup> | 155.0                                | 0.130                                              |
|                                         | OTf <sup>-</sup>                | 99.0                                 | 0.080                                              |

Figure S4: Temperature dependence of the molecular volume of the cations and anions in the [C<sub>2</sub>mim]N(CN)<sub>2</sub> system (blue) and [C<sub>2</sub>mim]OTf system (orange). The dotted lines correspond to the fit in Eq. (1).

Using the linear fit for the molecular volume  $V_{\kappa}(s=0, T)$

$$V_{\kappa}(s=0, T) = V_{\kappa}^0 + \Delta V_{\kappa} \cdot T \quad (1)$$

one can determine the "free-space" stemming from the thermal expansion of the liquid, *i.e.*  $\Delta V_{\kappa} \cdot T$ . The extrapolation to zero temperature yields the temperature-independent "crystal volume"  $V_{\kappa}^0$ . As shown in the table of Fig. S4 the expansion is quite small compared to the crystal volume  $V_{\kappa}^0$ . Hence, the molecular volume increases by roughly 5% in our temperature interval.

Doolittle defined relative free-space as ratio  $V_f/V_0 = (V - V_0)/V_0$ .<sup>1</sup> Applying Eq. (1) for the ionic liquid pair yields

$$\frac{V_f(T)}{V_0} = \frac{(\sum_{\kappa} V_{\kappa}^0 + \sum_{\kappa} \Delta V_{\kappa} \cdot T) - \sum_{\kappa} V_{\kappa}^0}{\sum_{\kappa} V_{\kappa}^0} = \frac{\sum_{\kappa} \Delta V_{\kappa}}{\sum_{\kappa} V_{\kappa}^0} \cdot T \quad (2)$$

In his model, the viscosity of the system depends on that ratio:

$$\eta(T) = A e^{\frac{B}{V_f(T)/V_0}} = A e^{\frac{B}{T \sum_{\kappa} \Delta V_{\kappa} / \sum_{\kappa} V_{\kappa}^0}} \quad (3)$$

Comparing this result to a classical Arrhenius behavior  $\eta = A \exp(E_A/(k_B N_A T))$  leads to a temperature independent activation energy  $E_A$

$$\frac{B}{\sum_{\kappa} \Delta V_{\kappa} / \sum_{\kappa} V_{\kappa}^0} = \frac{E_A}{k_B N_A} \quad (4)$$

$$E_A = B \frac{k_B N_A}{\sum_{\kappa} \Delta V_{\kappa} / \sum_{\kappa} V_{\kappa}^0} \quad (5)$$

which is in accordance with our results for the dynamics of the system. Therefore, we do not need a Vogel-Fulcher-Tammann equation or a compensated Arrhenius-approach<sup>2,3</sup> as our temperature regime is limited and far away from the glass transition temperature.

Interestingly, the ratio  $\sum_{\kappa} \Delta V_{\kappa} / \sum_{\kappa} V_{\kappa}^0$  is 0.0008 for both ionic liquid systems. Consequently, the different activation energies for [C<sub>2</sub>mim]N(CN)<sub>2</sub> and [C<sub>2</sub>mim]OTf arise from the different  $B$  constants.

## 1.2 Coordination numbers and potential of mean force

The decomposition of the entire simulation box into molecular Voronoi-polyhedra allows for

- determining the coordination numbers  $N_{\kappa\lambda}$  by counting shared surfaces. The mean value of the obtained numbers are the very same as using

$$N_{\kappa\lambda} = c_\lambda \int_0^\infty g_{\kappa\lambda}(r, s = 1) \cdot 4\pi r^2 dr \quad (6)$$

using the concentration  $c_\lambda = N_\lambda/V$ .

- evaluating the molecular volume ( $s = 0$  for each species and the volume of the first solvation shell  $s = 1$ ). Of course, the following equations should hold for all temperatures (except for rounding errors):

$$V = N \cdot (V_\oplus(s = 0) + V_\ominus(s = 0)) \quad (7)$$

$$V_\oplus(s = 1) = N_{\oplus\oplus} V_\oplus(s = 0) + N_{\oplus\ominus} V_\ominus(s = 0) \quad (8)$$

$$V_\ominus(s = 1) = N_{\oplus\ominus} V_\oplus(s = 0) + N_{\ominus\ominus} V_\ominus(s = 0) \quad (9)$$

The first condition is enforced by the space-filling of the Voronoi-tessellation. The second and third equation results from the definition of the solvation shell. The corresponding volumes are given in Table S1.

Table S2: Coordination numbers obtained by integration of the radial distribution functions of the first shell of [C<sub>2</sub>mim]N(CN)<sub>2</sub> (top) and [C<sub>2</sub>mim]OTf (bottom), as well as boxlengths and volumes.

|                                        | $T / \text{K}$ | $N$  | $N_{\oplus\ominus}$ | $N_{\oplus\oplus}$ | $N_{\ominus\ominus}$ | Boxlength / $\text{\AA}$ | $V / \text{\AA}^3$ |
|----------------------------------------|----------------|------|---------------------|--------------------|----------------------|--------------------------|--------------------|
| [C <sub>2</sub> mim]N(CN) <sub>2</sub> | 260            | 1000 | 7.898               | 11.597             | 1.989                | 64.27                    | 265476             |
|                                        | 280            | 1000 | 7.872               | 11.618             | 2.042                | 64.51                    | 268461             |
|                                        | 300            | 1000 | 7.840               | 11.644             | 2.089                | 64.76                    | 271594             |
|                                        | 320            | 1000 | 7.846               | 11.677             | 2.132                | 65.07                    | 275513             |
|                                        | 340            | 1000 | 7.848               | 11.703             | 2.174                | 65.34                    | 278957             |
| [C <sub>2</sub> mim]OTf                | 260            | 1000 | 8.035               | 9.689              | 4.802                | 67.61                    | 309053             |
|                                        | 280            | 1000 | 8.040               | 9.693              | 4.809                | 67.87                    | 312632             |
|                                        | 300            | 1000 | 8.056               | 9.704              | 4.827                | 68.16                    | 316657             |
|                                        | 320            | 1000 | 8.045               | 9.715              | 4.835                | 68.48                    | 321138             |
|                                        | 340            | 1000 | 8.097               | 9.719              | 4.840                | 68.81                    | 325803             |

As the volume of the simulation box increases with temperature, the corresponding concentrations  $c_\lambda$  decrease. This trend also applies to the first solvation shell except for dicyanamides around dicyanamides.

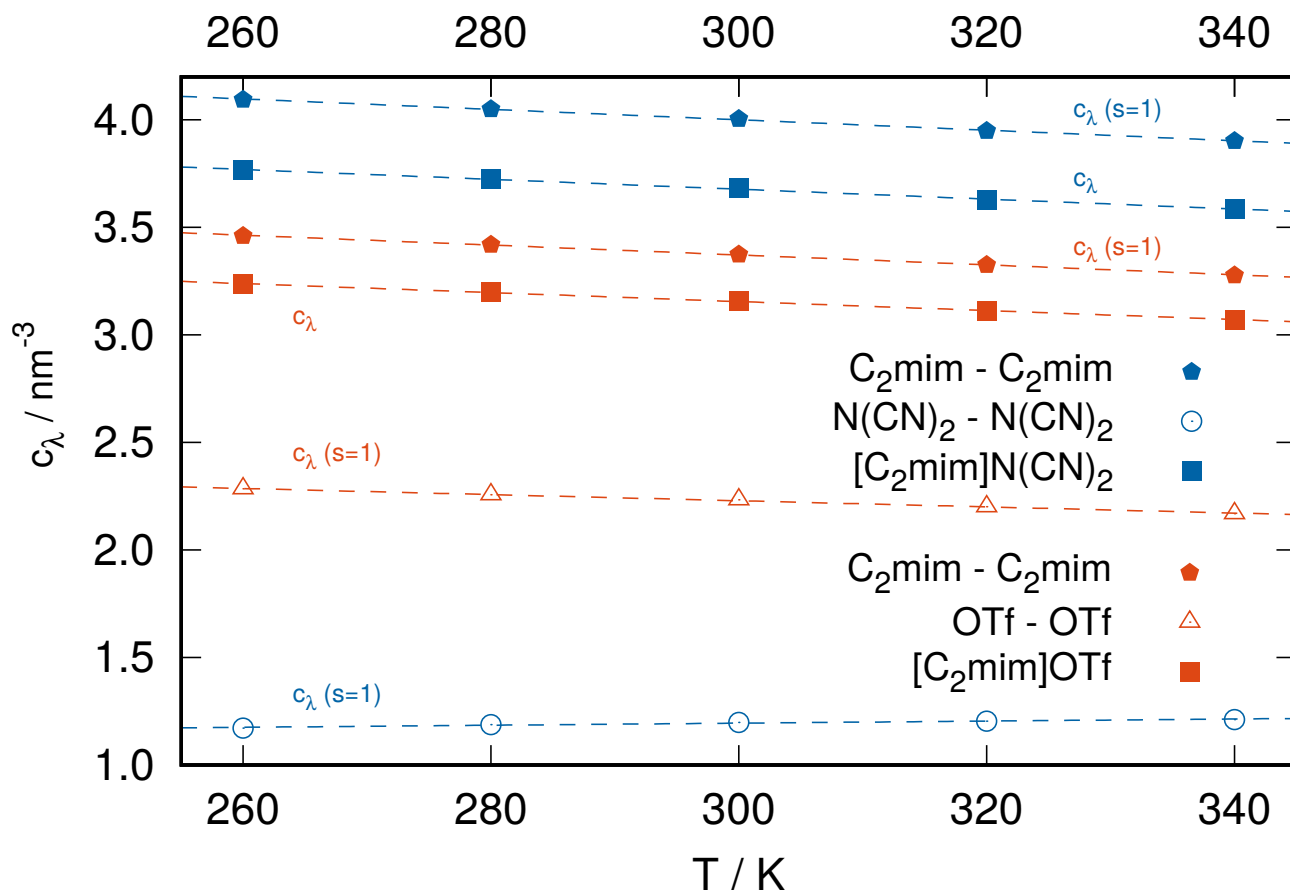

Figure S5: Concentrations (number densities) of the ionic liquids [C<sub>2</sub>mim]N(CN)<sub>2</sub> and [C<sub>2</sub>mim]OTf.  $c_\lambda(s = 1)$  is the number density of the Voronoi contact shell, as given in the main article,  $c_\lambda$  is the global number density. Note how local density is higher for cation-cation data but lower for anion-anion data, explaining why the *PMF* is negative for the former but positive for the latter.

The positive linear trend of the  $PMF_{\kappa\lambda}$  for the anions (open symbols) is shown in the bottom panel of Fig. 2 of the main article. Although the coordination number  $N_{\kappa\lambda}$  increases for  $\kappa = \lambda = \{N(CN)_2^-, OTf^-\}$  with temperature, the shell volume  $V(s = 1)$  increases more rapidly. As a result,  $c_\lambda(s = 1)/c_\lambda$  decreases for anions around anions with increasing temperature in contrast to the situation of the cations (see Fig. S5 of the ESI). Consequently, the *PMF* for the anions shows a positive trend, whereas it is negative for the cations.

## 2 Dynamics

### 2.1 Transport properties

One of the primary challenges of experimentally determining such properties arises due to sample impurity. As reported elsewhere,<sup>4</sup> water content and other impurities can have a profound effect on the viscosity (and, to a lesser extent, density). This, in turn, can negatively influence the reproducibility of other measurements, making a comparison with existing literature difficult. Please note that these coefficients do not include mutual pair diffusion and are thus not the same as the sample diffusion coefficient  $D$  obtained by some experiments, which is linked to the dynamic viscosity  $\eta$ .

Table S3: Viscosities of [C<sub>2</sub>mim]N(CN)<sub>2</sub> (top) and [C<sub>2</sub>mim]OTf (bottom). The values were determined by applying a cosine-shaped acceleration profile of 0.005, 0.01, 0.02, 0.03, 0.04 and 0.05 nm ps<sup>-2</sup> and extrapolating the resulting values to zero.

|                                        | T<br>[K] | $\eta$<br>[Pa s] | T<br>[K] | ${}^a\eta$<br>[Pa s] |
|----------------------------------------|----------|------------------|----------|----------------------|
| [C <sub>2</sub> mim]N(CN) <sub>2</sub> | 260      | 0.22             | 258.15   | 0.075                |
|                                        | 280      | 0.076            | 278.15   | 0.029                |
|                                        | 300      | 0.036            | 298.15   | 0.015                |
|                                        | 320      | 0.018            | 323.15   | 0.0078               |
|                                        | 340      | 0.011            | 343.15   | 0.0054               |
| [C <sub>2</sub> mim]OTf                | 260      | 0.57             | 268.15   | 0.17                 |
|                                        | 280      | 0.26             | 278.15   | 0.10                 |
|                                        | 300      | 0.095            | 298.15   | 0.043                |
|                                        | 320      | 0.044            | 323.15   | 0.020                |
|                                        | 340      | 0.023            | 343.15   | 0.012                |

<sup>a</sup>: Experimental values for [C<sub>2</sub>mim]N(CN)<sub>2</sub> taken from Ref. 5, for [C<sub>2</sub>mim]OTf from Ref. 6

Table S4: Diffusion coefficients of the cations ( $D_{\oplus}$ ) and the anions ( $D_{\ominus}$ ), calculated from the slopes of the mean squared displacement of the center of mass at the specified temperatures of [C<sub>2</sub>mim]N(CN)<sub>2</sub> (top) and [C<sub>2</sub>mim]OTf (bottom). The second value includes the correction due to the periodic boundary conditions in Eq. (10)

|                                        | T<br>[K] | $D_{\oplus}$<br>[10 <sup>-11</sup> m <sup>2</sup> s <sup>-1</sup> ] | $D_{\ominus}$<br>[10 <sup>-11</sup> m <sup>2</sup> s <sup>-1</sup> ] | $\sigma_{NE}$<br>[S m <sup>-1</sup> ] | T<br>[K] | ${}^aD_{\oplus}$<br>[10 <sup>-11</sup> m <sup>2</sup> s <sup>-1</sup> ] | T<br>[K] | ${}^aD_{\ominus}$<br>[10 <sup>-11</sup> m <sup>2</sup> s <sup>-1</sup> ] |
|----------------------------------------|----------|---------------------------------------------------------------------|----------------------------------------------------------------------|---------------------------------------|----------|-------------------------------------------------------------------------|----------|--------------------------------------------------------------------------|
| [C <sub>2</sub> mim]N(CN) <sub>2</sub> | 260      | 0.48 / 0.52                                                         | 0.60 / 0.64                                                          | 0.31                                  | 260      | 0.75                                                                    |          |                                                                          |
|                                        | 280      | 1.6 / 1.7                                                           | 2.1 / 2.2                                                            | 0.97                                  | 280      | 2.64                                                                    |          |                                                                          |
|                                        | 300      | 4.0 / 4.3                                                           | 5.2 / 5.5                                                            | 2.2                                   | 300      | 5.15                                                                    |          |                                                                          |
|                                        | 320      | 7.7 / 8.3                                                           | 10.0 / 10.6                                                          | 4.0                                   | 320      | 8.70                                                                    |          |                                                                          |
|                                        | 340      | 13. / 14.                                                           | 18. / 19.                                                            | 6.5                                   | 340      | 14.8                                                                    |          |                                                                          |
| [C <sub>2</sub> mim]OTf                | 260      | 0.18 / 0.19                                                         | 0.087 / 0.10                                                         | 0.068                                 | 268.2    | 1.12                                                                    | 273.2    | 0.822                                                                    |
|                                        | 280      | 0.70 / 0.73                                                         | 0.36 / 0.39                                                          | 0.24                                  | 278.5    | 1.87                                                                    | 278.3    | 1.04                                                                     |
|                                        | 300      | 2.0 / 2.1                                                           | 1.1 / 1.2                                                            | 0.64                                  | 298.2    | 4.36                                                                    | 298.4    | 2.47                                                                     |
|                                        | 320      | 4.7 / 4.9                                                           | 2.3 / 2.5                                                            | 1.4                                   | 322.9    | 9.45                                                                    | 322.9    | 5.68                                                                     |
|                                        | 340      | 8.7 / 9.1                                                           | 5.4 / 5.8                                                            | 2.5                                   | 343.1    | 15.6                                                                    | 343.2    | 9.11                                                                     |

<sup>a</sup>: Experimental values for [C<sub>2</sub>mim]N(CN)<sub>2</sub> taken from Ref. 7, for [C<sub>2</sub>mim]OTf from Ref. 6

$$D^{\infty} = D^L + \frac{\xi k_B T}{6\pi\eta L} \quad (10)$$

Based on the Nernst-Einstein equation

$$\sigma_{NE} = \frac{1}{k_B T} \sum_{\kappa} |q_{\kappa}|^2 \rho_{\kappa} D_{\kappa} \quad (11)$$

the static conductivity can be approximated. However, due to the neglect of collective interactions, this estimate exceeds significantly the dc conductivity  $\sigma$ . The total conductivity was calculated from  $\langle \Delta M_J^2(t) \rangle$ ,  $\sigma_{\oplus\oplus}$  from  $\langle (\Delta M_J^{\oplus}(t))^2 \rangle$ ,  $\sigma_{\oplus\ominus}$  from  $\langle (\Delta M_J^{\oplus}(t) \Delta M_J^{\ominus}(t)) \rangle$  and  $\sigma_{\ominus\ominus}$  from  $\langle (\Delta M_J^{\ominus}(t))^2 \rangle$ .  $\sigma_{\oplus}$  and  $\sigma_{\ominus}$  were obtained by adding the terms containing a cation or anion term, respectively.

Table S5: Conductivities  $\sigma$  calculated from the slopes of the mean squared displacement of the electric dipole moment. The top part presents data for [C<sub>2</sub>mim]N(CN)<sub>2</sub>, the bottom part for [C<sub>2</sub>mim]OTf.

|                                        | T<br>[K] | $\sigma$<br>[S m <sup>-1</sup> ] | $\sigma_{\oplus\oplus}$<br>[S m <sup>-1</sup> ] | $\sigma_{\oplus\ominus}$<br>[S m <sup>-1</sup> ] | $\sigma_{\ominus\ominus}$<br>[S m <sup>-1</sup> ] | $\sigma_{\oplus}$<br>[S m <sup>-1</sup> ] | $\sigma_{\ominus}$<br>[S m <sup>-1</sup> ] | T<br>[K] | <sup>a</sup> $\sigma_{exp}$<br>[S m <sup>-1</sup> ] |
|----------------------------------------|----------|----------------------------------|-------------------------------------------------|--------------------------------------------------|---------------------------------------------------|-------------------------------------------|--------------------------------------------|----------|-----------------------------------------------------|
| [C <sub>2</sub> mim]N(CN) <sub>2</sub> | 260      | 0.278                            | 0.038                                           | 0.064                                            | 0.111                                             | 0.102                                     | 0.176                                      | 258.15   | 0.63                                                |
|                                        | 280      | 0.715                            | 0.101                                           | 0.167                                            | 0.280                                             | 0.268                                     | 0.447                                      | 278.15   | 1.6                                                 |
|                                        | 300      | 1.231                            | 0.168                                           | 0.286                                            | 0.490                                             | 0.455                                     | 0.777                                      | 298.15   | 2.9                                                 |
|                                        | 320      | 2.568                            | 0.356                                           | 0.600                                            | 1.013                                             | 0.956                                     | 1.613                                      | 323.15   | 5.2                                                 |
|                                        | 340      | 3.363                            | 0.462                                           | 0.785                                            | 1.329                                             | 1.249                                     | 2.114                                      | 343.15   | 7.3                                                 |
| [C <sub>2</sub> mim]OTf                | 260      | 0.0466                           | 0.0197                                          | 0.0069                                           | 0.0129                                            | 0.0268                                    | 0.020                                      | 273.15   | 0.35                                                |
|                                        | 280      | 0.178                            | 0.064                                           | 0.041                                            | 0.032                                             | 0.105                                     | 0.074                                      | 278.15   | 0.43                                                |
|                                        | 300      | 0.515                            | 0.172                                           | 0.125                                            | 0.094                                             | 0.297                                     | 0.218                                      | 298.15   | 0.92                                                |
|                                        | 320      | 0.996                            | 0.330                                           | 0.243                                            | 0.181                                             | 0.573                                     | 0.424                                      | 323.15   | 1.8                                                 |
|                                        | 340      | 1.607                            | 0.525                                           | 0.392                                            | 0.297                                             | 0.917                                     | 0.690                                      | 343.15   | 2.8                                                 |

<sup>a</sup>: Experimental values for [C<sub>2</sub>mim]N(CN)<sub>2</sub> taken from Ref. 5, [C<sub>2</sub>mim]OTf from Ref. 6

## 2.2 Molecular rotational relaxation

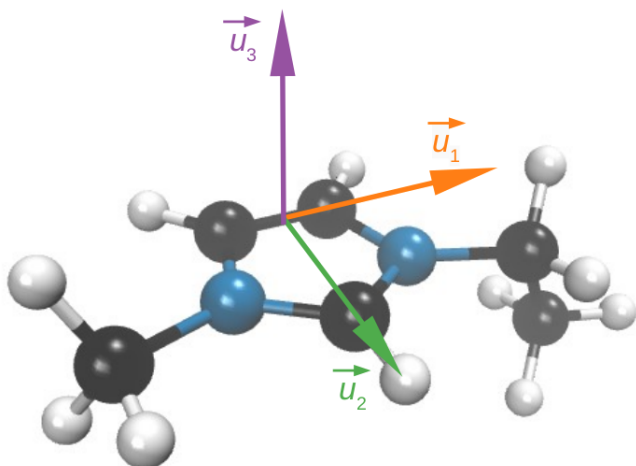

Figure S6: The three body-fixed axes used in the rotational anisotropy study. Please note that the axes do not describe rotationally inert axes, but oriented vectors whose rotational movement is tracked.

- $\vec{u}_1$  is located in the imidazolium plane and is defined as the vector joining  $C_4$  and  $C_5$ .
- $\vec{u}_2$  is also in the imidazolium plane and connects the bond between  $C_4$ - $C_5$  with  $C_2$ .
- $\vec{u}_3$  is defined as the cross product of  $\vec{u}_1$  and  $\vec{u}_2$  and represents the out-of-plane dimension.

Table S6: Relaxation times for  $[\text{C}_2\text{mim}]\text{N}(\text{CN})_2$  (top part) and  $[\text{C}_2\text{mim}]\text{OTf}$  (bottom part).  $\tau_{\oplus}^{\mu}$  symbolizes the relaxation time of the  $\text{C}_2\text{mim}$  dipole,  $\tau_{\ominus}^{\mu}$  the relaxation time of the anion dipole whereas  $\tau^{u1}$ ,  $\tau^{u2}$  and  $\tau^{u3}$  refer to the relaxation times of the three body-fixed axes.

|                                                    | T<br>[K] | $\langle \mu_{\ominus}(0) \cdot \mu_{\ominus}(0) \rangle$<br>[ $e^2 \text{Å}^2$ ] | $\tau_{\ominus}^{\mu}$<br>[ps] | $\langle \mu_{\oplus}(0) \cdot \mu_{\oplus}(0) \rangle$<br>[ $e^2 \text{Å}^2$ ] | $\tau_{\oplus}^{\mu}$<br>[ps] | $\tau^{u1}$<br>[ps] | $\tau^{u2}$<br>[ps] | $\tau^{u3}$<br>[ps] |
|----------------------------------------------------|----------|-----------------------------------------------------------------------------------|--------------------------------|---------------------------------------------------------------------------------|-------------------------------|---------------------|---------------------|---------------------|
| [ $\text{C}_2\text{mim}$ ] $\text{N}(\text{CN})_2$ | 260      | 0.976                                                                             | 137.0                          | 5.52                                                                            | 2132                          | 2779                | 1021                | 1271                |
|                                                    | 280      | 0.985                                                                             | 35.32                          | 5.51                                                                            | 698.8                         | 888.7               | 318.2               | 397.1               |
|                                                    | 300      | 0.997                                                                             | 14.75                          | 5.48                                                                            | 298.3                         | 384.4               | 143.0               | 178.7               |
|                                                    | 320      | 1.01                                                                              | 7.267                          | 5.48                                                                            | 152.6                         | 196.6               | 73.93               | 91.31               |
|                                                    | 340      | 1.02                                                                              | 4.549                          | 5.47                                                                            | 93.63                         | 120.5               | 45.19               | 55.94               |
| [ $\text{C}_2\text{mim}$ ] $\text{OTf}$            | 260      | 33.5                                                                              | 4824                           | 6.53                                                                            | 7208                          | 8343                | 3215                | 3227                |
|                                                    | 280      | 33.3                                                                              | 1246                           | 6.44                                                                            | 2138                          | 2554                | 831.3               | 899.3               |
|                                                    | 300      | 33.2                                                                              | 441.6                          | 6.33                                                                            | 778.4                         | 946.0               | 316.1               | 346.4               |
|                                                    | 320      | 33.1                                                                              | 196.7                          | 6.27                                                                            | 364.0                         | 445.9               | 150.4               | 164.7               |
|                                                    | 340      | 33.0                                                                              | 104.4                          | 6.20                                                                            | 194.5                         | 236.9               | 82.21               | 91.81               |



## 2.3 Collective rotational relaxation

### 2.3.1 Contributions to the dielectric spectrum

The dielectric spectrum is computed on the level of collective rotational correlation functions.

$$\vec{M}_D(t) = \vec{M}_D^\oplus(t) + \vec{M}_D^\ominus(t) \quad (12)$$

$$= \sum_{i \in \oplus} \vec{\mu}_i(t) + \sum_{i \in \ominus} \vec{\mu}_i(t) \quad (13)$$

$$\langle \vec{M}_D(0) \cdot \vec{M}_D(t) \rangle = \langle \vec{M}_D^\oplus(0) \cdot \vec{M}_D^\oplus(t) \rangle + 2\langle \vec{M}_D^\oplus(0) \cdot \vec{M}_D^\ominus(t) \rangle + \langle \vec{M}_D^\ominus(0) \cdot \vec{M}_D^\ominus(t) \rangle \quad (14)$$

The numerical correlation functions are typically noisy since only one sample dipole is recorded instead of  $N_\kappa$  molecular ones. Consequently, we cannot integrate the correlation functions directly but use triexponential functions

$$\Phi(t) = A_1 \exp[-t/\tau_1] + A_2 \exp[-t/\tau_2] + A_3 \exp[-t/\tau_3] \quad (15)$$

to fit the correlation functions instead. This is in accordance with a recent dielectric study on these systems.<sup>8</sup>

Table S7: Fitted relaxation times of the collective rotational dipole moments of each ion interaction of [C<sub>2</sub>mim]N(CN)<sub>2</sub> (top rows) and [C<sub>2</sub>mim]OTf (bottom rows).  $\tau_1$ ,  $\tau_2$  and  $\tau_3$  denote exponential relaxation times.  $\bar{\tau}$  is the average relaxation time weighted by the corresponding amplitudes

| T<br>[K]                               | $\langle M_D^\oplus(0)M_D^\oplus(t) \rangle$ |                  |                  |                  |                      | $\langle M_D^\oplus(0)M_D^\ominus(t) \rangle$ |                  |                  |                  |                      | $\langle M_D^\ominus(0)M_D^\ominus(t) \rangle$ |                  |                  |                  |                      |      |
|----------------------------------------|----------------------------------------------|------------------|------------------|------------------|----------------------|-----------------------------------------------|------------------|------------------|------------------|----------------------|------------------------------------------------|------------------|------------------|------------------|----------------------|------|
|                                        | $A_{\oplus\oplus}$<br>[D <sup>2</sup> ]      | $\tau_1$<br>[ps] | $\tau_2$<br>[ps] | $\tau_3$<br>[ps] | $\bar{\tau}$<br>[ps] | $A_{\oplus\ominus}$<br>[D <sup>2</sup> ]      | $\tau_1$<br>[ps] | $\tau_2$<br>[ps] | $\tau_3$<br>[ps] | $\bar{\tau}$<br>[ps] | $A_{\ominus\ominus}$<br>[D <sup>2</sup> ]      | $\tau_1$<br>[ps] | $\tau_2$<br>[ps] | $\tau_3$<br>[ps] | $\bar{\tau}$<br>[ps] |      |
| [C <sub>2</sub> mim]N(CN) <sub>2</sub> | 260                                          | 4060             | 2070             | 60.5             | 0.0731               | 1400                                          | 238              | 1600             | 7.65             | 0.0337               | 722                                            | 780              | 369              | 9.78             | 0.0596               | 97.0 |
|                                        | 280                                          | 4090             | 668              | 7.42             | 0.0713               | 580                                           | 171              | 654              | 55.4             | 0.0353               | 32.7                                           | 780              | 122              | 1.67             | 0.0550               | 28.0 |
|                                        | 300                                          | 3980             | 505              | 39.7             | 0.167                | 327                                           | 190              | 401              | 8.43             | 0.0357               | 108                                            | 800              | 50.9             | 0.955            | 0.0512               | 10.1 |
|                                        | 320                                          | 4280             | 196              | 7.82             | 0.0787               | 163                                           | 199              | 233              | 8.94             | 0.0369               | 66.0                                           | 800              | 32.2             | 0.802            | 0.0511               | 5.11 |
|                                        | 340                                          | 4180             | 124              | 8.67             | 0.123                | 100                                           | 197              | 122              | 9.13             | 0.0383               | 35.1                                           | 820              | 26.1             | 0.723            | 0.0514               | 3.28 |
| [C <sub>2</sub> mim]OTf                | 260                                          | 2660             | 1860             | 17.1             | 0.113                | 1390                                          | 1670             | 5610             | 19.3             | 0.216                | 3600                                           | 12500            | 703              | 25.1             | 0.587                | 452  |
|                                        | 280                                          | 3980             | 1330             | 8.81             | 0.114                | 1130                                          | 1690             | 345              | 8.63             | 0.230                | 266                                            | 14600            | 377              | 22.3             | 0.649                | 225  |
|                                        | 300                                          | 3640             | 530              | 22.1             | 0.165                | 393                                           | 2120             | 363              | 28.7             | 0.352                | 217                                            | 14800            | 225              | 13.8             | 0.591                | 128  |
|                                        | 320                                          | 4510             | 539              | 47.0             | 0.159                | 348                                           | 2370             | 330              | 9.27             | 0.260                | 249                                            | 16000            | 91.6             | 8.17             | 0.557                | 57.3 |
|                                        | 340                                          | 4640             | 187              | 6.42             | 0.130                | 158                                           | 2300             | 137              | 8.67             | 0.269                | 94.1                                           | 15800            | 50.5             | 6.60             | 0.578                | 30.4 |

The amplitude  $A$  is the first value of the corresponding correlation function  $\langle M_D^k(0) \cdot M_D^k(t) \rangle$ . It is close to the sum of the amplitudes  $A_a$  of the fitted exponential processes:

$$A = \sum_a A_a \quad (16)$$

The average time constant  $\bar{\tau}$  is the amplitude weighted average of the exponential relaxation constants  $\tau$ :

$$\bar{\tau} = \frac{\sum_a A_a \cdot \tau_a}{\sum_a A_a} \quad (17)$$

### 2.3.2 Alternative decomposition of the collective rotational correlation function

The correlation functions in Table S7 directly contribute to the frequency-dependent dielectric spectrum. However, for the discussion of collectivity we compared the collective rotational correlation function  $\langle \vec{M}_D(0) \cdot \vec{M}_D(t) \rangle$  to the single-particle rotational correlation function  $\langle \vec{\mu}_i(0) \cdot \vec{\mu}_i(t) \rangle$ . According to Eq. (27) of the main article, the cross-correlations can be obtained from the difference of collective and single-particle rotation:

$$\sum_i \sum_{j \neq i} \langle \vec{\mu}_i(0) \cdot \vec{\mu}_j(t) \rangle = \langle \vec{M}_D(0) \cdot \vec{M}_D(t) \rangle - \sum_{i \in \oplus} \langle \vec{\mu}_i(0) \cdot \vec{\mu}_i(t) \rangle - \sum_{j \in \ominus} \langle \vec{\mu}_j(0) \cdot \vec{\mu}_j(t) \rangle \quad (18)$$

This cross-correlation is displayed in Fig. S7 for both ionic liquids. The amplitude in case of [C<sub>2</sub>mim]OTf is stronger and show a clear decreasing trend with increasing temperature. Interestingly, these cross-correlation functions do not start at zero. This finding indicates that some single-particle dipole moments  $\mu_i$  are always coupled.

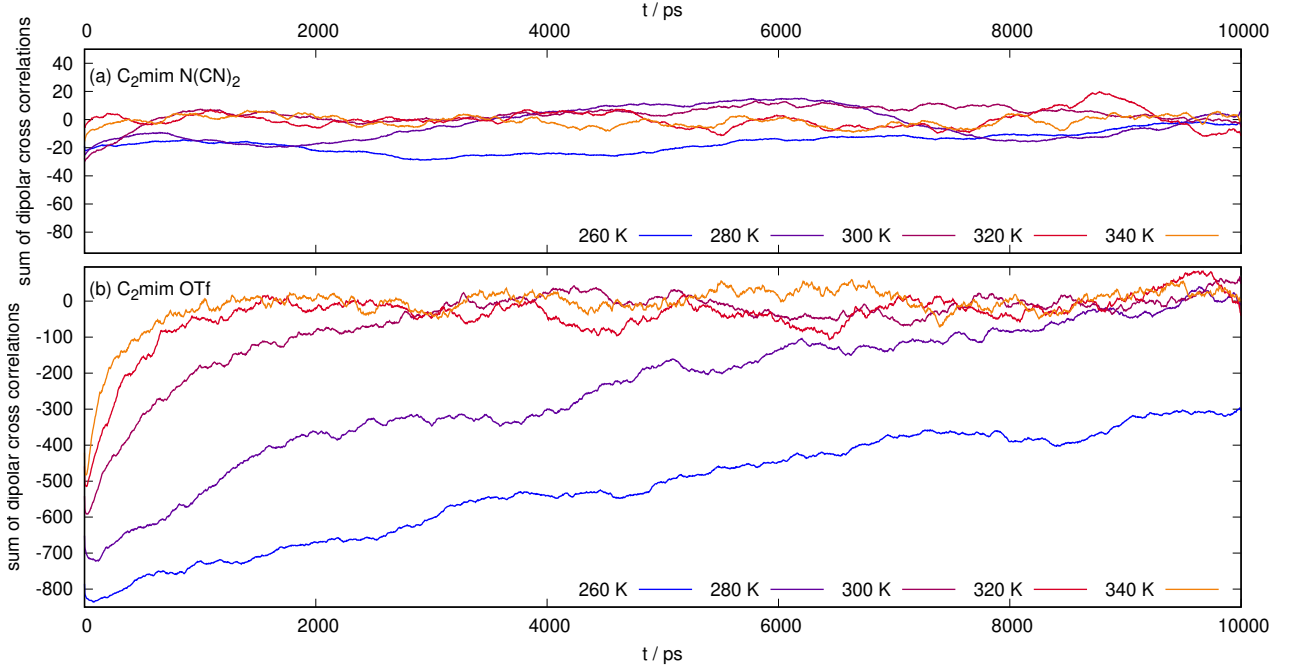

Figure S7: Dipolar cross correlations  $\sum_i \sum_{j \neq i} \langle \vec{\mu}_i(0) \cdot \vec{\mu}_j(t) \rangle$ .

Please note that this decomposition is an alternative approach compared to the previous section. Consequently, the decomposing contributions are not directly related to each other:

$$\sum_{i \in \oplus} \langle \vec{\mu}_i(0) \cdot \vec{\mu}_i(t) \rangle \neq \langle \vec{M}_D^{\oplus}(0) \cdot \vec{M}_D^{\oplus}(t) \rangle \quad (19)$$

$$\sum_{i \in \ominus} \langle \vec{\mu}_i(0) \cdot \vec{\mu}_i(t) \rangle \neq \langle \vec{M}_D^{\ominus}(0) \cdot \vec{M}_D^{\ominus}(t) \rangle \quad (20)$$

$$\langle \vec{M}_D^{\oplus}(0) \cdot \vec{M}_D^{\ominus}(t) \rangle \neq \sum_i \sum_{j \neq i} \langle \vec{\mu}_i(0) \cdot \vec{\mu}_j(t) \rangle \quad (21)$$

since cations also interact with other cations for example which is neglected on the left hand sides of Eq. (19) and (21) but included on the corresponding right hand sides.

## 2.4 Arrhenius prefactors

Table S8: Pre-exponential factors for diffusion, conductivity, single-particle and collective rotation.

|                                                 |                               | [C <sub>2</sub> mim]N(CN) <sub>2</sub> | [C <sub>2</sub> mim]OTf |
|-------------------------------------------------|-------------------------------|----------------------------------------|-------------------------|
| Diffusion<br>[m <sup>2</sup> s <sup>-1</sup> ]  | D <sup>⊕</sup>                | 6.74 × 10 <sup>-6</sup>                | 2.95 × 10 <sup>-5</sup> |
|                                                 | D <sup>⊖</sup>                | 1.09 × 10 <sup>-5</sup>                | 3.15 × 10 <sup>-5</sup> |
| Conductivity<br>[S m <sup>-1</sup> ]            | σ                             | 1.40 × 10 <sup>4</sup>                 | 2.09 × 10 <sup>4</sup>  |
|                                                 | σ <sup>⊕</sup>                | 5.31 × 10 <sup>3</sup>                 | 1.15 × 10 <sup>5</sup>  |
|                                                 | σ <sup>⊖</sup>                | 8.68 × 10 <sup>3</sup>                 | 9.53 × 10 <sup>5</sup>  |
|                                                 | σ <sup>⊕⊕</sup>               | 1.94 × 10 <sup>3</sup>                 | 2.90 × 10 <sup>4</sup>  |
|                                                 | σ <sup>⊕⊖</sup>               | 3.37 × 10 <sup>3</sup>                 | 2.43 × 10 <sup>5</sup>  |
|                                                 | σ <sup>⊖⊖</sup>               | 8.68 × 10 <sup>3</sup>                 | 1.14 × 10 <sup>4</sup>  |
| Single-particle rotation<br>[ps <sup>-1</sup> ] | τ <sub>⊖</sub> <sup>μμ</sup>  | 1.64 × 10 <sup>4</sup>                 | 2.78 × 10 <sup>3</sup>  |
|                                                 | τ <sub>⊕</sub> <sup>μμ</sup>  | 3.17 × 10 <sup>2</sup>                 | 7.29 × 10 <sup>2</sup>  |
|                                                 | τ <sup>u1</sup>               | 2.52 × 10 <sup>2</sup>                 | 4.99 × 10 <sup>2</sup>  |
|                                                 | τ <sup>u2</sup>               | 5.97 × 10 <sup>2</sup>                 | 1.94 × 10 <sup>3</sup>  |
|                                                 | τ <sup>u3</sup>               | 4.96 × 10 <sup>2</sup>                 | 1.27 × 10 <sup>3</sup>  |
| Collective rotation<br>[ps <sup>-1</sup> ]      | τ <sub>⊕⊕</sub> <sup>MM</sup> | 6.22 × 10 <sup>1</sup>                 | 4.99 × 10 <sup>0</sup>  |
|                                                 | τ <sub>⊖⊖</sub> <sup>MM</sup> | 3.19 × 10 <sup>2</sup>                 | 9.90 × 10 <sup>1</sup>  |
|                                                 | τ <sub>⊕⊖</sub> <sup>MM</sup> | 2.39 × 10 <sup>1</sup>                 | 1.90 × 10 <sup>2</sup>  |

### 3 Input scripts

Below is a list of CHARMM topology and parameter files, as well as the dynamics input for [C<sub>2</sub>mim]N(CN)<sub>2</sub> at 260 K.

#### 3.1 Topology

\* TOPOLOGY FILE .

\*

```
  99  1
MASS  1 h1      1.008000
MASS  2 h4      1.008000
MASS  3 h5      1.008000
MASS  4 hc      1.008000
MASS  6 c3     12.010000
MASS  7 cc     12.010000
MASS  8 cd     12.010000
MASS  9 cg     12.010000
MASS 10 o      16.000000
MASS 13 n1     14.010000
MASS 14 na     14.010000
MASS 15 ne     14.010000
MASS 16 f      19.000000
MASS 18 s6     32.060000
MASS 19 c      12.010000
MASS 20 oa     16.000000
MASS 51 ODW    15.999400  ! water oxygen
MASS 52 HDW    1.008000  ! water hydrogen
MASS 60 LP     0.000000  ! general lone pair
MASS 61 DRUD   0.000000  ! drude particle
```

AUTOGENERATE DRUDE !note use of DRUDE

---

---

!EMIM

---

---

RESI EMIM 1.000

GROUP

```
ATOM C    C3      0.045  ALPHA -2.025  THOLE 1.135
ATOM H    H1      0.053
ATOM H1   H1      0.053
ATOM H2   H1      0.053
ATOM N    NA      0.102  ALPHA -0.901  THOLE 1.138
ATOM C1   CC      0.003  ALPHA -1.533  THOLE 1.409
ATOM N1   NA      0.102  ALPHA -0.901  THOLE 1.138
ATOM C2   CC     -0.076  ALPHA -1.563  THOLE 1.324
ATOM C3   CD     -0.076  ALPHA -1.563  THOLE 1.324
ATOM H3   H5      0.183
ATOM H4   H4      0.168
ATOM H5   H4      0.168
ATOM C4   C3     -0.005  ALPHA -1.675  THOLE 1.109
ATOM H6   H1      0.075
ATOM H7   H1      0.075
ATOM C5   C3      0.008  ALPHA -2.049  THOLE 1.125
ATOM H8   HC      0.023
ATOM H9   HC      0.023
ATOM H10  HC      0.023
```

```
BOND C    H          ! DIST      1.0796
BOND C    H1         ! DIST      1.0785
```

|         |     |   |      |        |
|---------|-----|---|------|--------|
| BOND C  | H2  | ! | DIST | 1.0794 |
| BOND C  | N1  | ! | DIST | 1.4658 |
| BOND N  | C1  | ! | DIST | 1.3138 |
| BOND N  | C3  | ! | DIST | 1.3781 |
| BOND N  | C4  | ! | DIST | 1.4777 |
| BOND C1 | N1  | ! | DIST | 1.3157 |
| BOND C1 | H3  | ! | DIST | 1.0692 |
| BOND N1 | C2  | ! | DIST | 1.3785 |
| BOND C2 | C3  | ! | DIST | 1.3416 |
| BOND C2 | H4  | ! | DIST | 1.0679 |
| BOND C3 | H5  | ! | DIST | 1.0688 |
| BOND C4 | H6  | ! | DIST | 1.0814 |
| BOND C4 | H7  | ! | DIST | 1.0798 |
| BOND C4 | C5  | ! | DIST | 1.5218 |
| BOND C5 | H8  | ! | DIST | 1.0835 |
| BOND C5 | H9  | ! | DIST | 1.0834 |
| BOND C5 | H10 | ! | DIST | 1.0837 |

|         |    |     |   |       |          |
|---------|----|-----|---|-------|----------|
| ANGL C  | N1 | C1  | ! | ANGLE | 126.4111 |
| ANGL C  | N1 | C2  | ! | ANGLE | 125.6300 |
| ANGL H  | C  | H1  | ! | ANGLE | 109.5510 |
| ANGL H  | C  | H2  | ! | ANGLE | 110.2559 |
| ANGL H  | C  | N1  | ! | ANGLE | 109.2611 |
| ANGL H1 | C  | H2  | ! | ANGLE | 109.5172 |
| ANGL H1 | C  | N1  | ! | ANGLE | 108.8792 |
| ANGL H2 | C  | N1  | ! | ANGLE | 109.3538 |
| ANGL N  | C1 | N1  | ! | ANGLE | 109.8941 |
| ANGL N  | C1 | H3  | ! | ANGLE | 125.1030 |
| ANGL N  | C3 | C2  | ! | ANGLE | 107.1959 |
| ANGL N  | C3 | H5  | ! | ANGLE | 122.1025 |
| ANGL N  | C4 | H6  | ! | ANGLE | 106.7043 |
| ANGL N  | C4 | H7  | ! | ANGLE | 106.9082 |
| ANGL N  | C4 | C5  | ! | ANGLE | 112.0836 |
| ANGL C1 | N  | C3  | ! | ANGLE | 107.9285 |
| ANGL C1 | N  | C4  | ! | ANGLE | 126.1921 |
| ANGL C1 | N1 | C2  | ! | ANGLE | 107.9577 |
| ANGL N1 | C1 | H3  | ! | ANGLE | 125.0025 |
| ANGL N1 | C2 | C3  | ! | ANGLE | 107.0236 |
| ANGL N1 | C2 | H4  | ! | ANGLE | 122.0406 |
| ANGL C2 | C3 | H5  | ! | ANGLE | 130.7003 |
| ANGL C3 | N  | C4  | ! | ANGLE | 125.8669 |
| ANGL C3 | C2 | H4  | ! | ANGLE | 130.9352 |
| ANGL C4 | C5 | H8  | ! | ANGLE | 111.2780 |
| ANGL C4 | C5 | H9  | ! | ANGLE | 111.5813 |
| ANGL C4 | C5 | H10 | ! | ANGLE | 109.0336 |
| ANGL H6 | C4 | H7  | ! | ANGLE | 107.7086 |
| ANGL H6 | C4 | C5  | ! | ANGLE | 111.3594 |
| ANGL H7 | C4 | C5  | ! | ANGLE | 111.7864 |
| ANGL H8 | C5 | H9  | ! | ANGLE | 108.5717 |
| ANGL H8 | C5 | H10 | ! | ANGLE | 108.3168 |
| ANGL H9 | C5 | H10 | ! | ANGLE | 107.9497 |

|         |   |    |    |   |      |           |
|---------|---|----|----|---|------|-----------|
| DIHE H  | C | N1 | C1 | ! | DIHE | -120.0991 |
| DIHE H1 | C | N1 | C1 | ! | DIHE | -0.4861   |
| DIHE H2 | C | N1 | C1 | ! | DIHE | 119.1407  |
| DIHE H  | C | N1 | C2 | ! | DIHE | 60.3500   |
| DIHE H1 | C | N1 | C2 | ! | DIHE | 179.9630  |
| DIHE H2 | C | N1 | C2 | ! | DIHE | -60.4102  |
| DIHE C3 | N | C1 | N1 | ! | DIHE | -0.0723   |
| DIHE C4 | N | C1 | N1 | ! | DIHE | -178.8479 |
| DIHE C3 | N | C1 | H3 | ! | DIHE | -179.8641 |

|         |    |    |     |   |      |           |
|---------|----|----|-----|---|------|-----------|
| DIHE C4 | N  | C1 | H3  | ! | DIHE | 1.3603    |
| DIHE C1 | N  | C3 | C2  | ! | DIHE | 0.1214    |
| DIHE C4 | N  | C3 | C2  | ! | DIHE | 178.9021  |
| DIHE C1 | N  | C3 | H5  | ! | DIHE | 179.7449  |
| DIHE C4 | N  | C3 | H5  | ! | DIHE | -1.4744   |
| DIHE C1 | N  | C4 | H6  | ! | DIHE | -17.3257  |
| DIHE C3 | N  | C4 | H6  | ! | DIHE | 164.1119  |
| DIHE C1 | N  | C4 | H7  | ! | DIHE | -132.3592 |
| DIHE C3 | N  | C4 | H7  | ! | DIHE | 49.0783   |
| DIHE C1 | N  | C4 | C5  | ! | DIHE | 104.8236  |
| DIHE C3 | N  | C4 | C5  | ! | DIHE | -73.7389  |
| DIHE N  | C1 | N1 | C   | ! | DIHE | -179.6202 |
| DIHE H3 | C1 | N1 | C   | ! | DIHE | 0.1719    |
| DIHE N  | C1 | N1 | C2  | ! | DIHE | -0.0039   |
| DIHE H3 | C1 | N1 | C2  | ! | DIHE | 179.7882  |
| DIHE C  | N1 | C2 | C3  | ! | DIHE | 179.7003  |
| DIHE C1 | N1 | C2 | C3  | ! | DIHE | 0.0802    |
| DIHE C  | N1 | C2 | H4  | ! | DIHE | -0.0517   |
| DIHE C1 | N1 | C2 | H4  | ! | DIHE | -179.6718 |
| DIHE N1 | C2 | C3 | N   | ! | DIHE | -0.1217   |
| DIHE H4 | C2 | C3 | N   | ! | DIHE | 179.6001  |
| DIHE N1 | C2 | C3 | H5  | ! | DIHE | -179.7009 |
| DIHE H4 | C2 | C3 | H5  | ! | DIHE | 0.0208    |
| DIHE N  | C4 | C5 | H8  | ! | DIHE | -60.5075  |
| DIHE H6 | C4 | C5 | H8  | ! | DIHE | 58.9472   |
| DIHE H7 | C4 | C5 | H8  | ! | DIHE | 179.4809  |
| DIHE N  | C4 | C5 | H9  | ! | DIHE | 60.9322   |
| DIHE H6 | C4 | C5 | H9  | ! | DIHE | -179.6130 |
| DIHE H7 | C4 | C5 | H9  | ! | DIHE | -59.0794  |
| DIHE N  | C4 | C5 | H10 | ! | DIHE | -179.9216 |
| DIHE H6 | C4 | C5 | H10 | ! | DIHE | -60.4668  |
| DIHE H7 | C4 | C5 | H10 | ! | DIHE | 60.0669   |
|         |    |    |     |   |      |           |
| IMPH C4 | C1 | N  | C3  |   |      |           |
| IMPH H3 | N1 | C1 | N   |   |      |           |
| IMPH C  | C1 | N1 | C2  |   |      |           |
| IMPH C3 | H4 | C2 | N1  |   |      |           |
| IMPH C2 | H5 | C3 | N   |   |      |           |

---



---

! TRIF

---



---

RESI TRIF -1.000

GROUP

|            |    |        |       |        |       |       |
|------------|----|--------|-------|--------|-------|-------|
| ATOM C     | C3 | 0.366  | ALPHA | -1.227 | THOLE | 1.068 |
| ATOM F     | F  | -0.190 | ALPHA | -0.028 | THOLE | 1.450 |
| ATOM F1    | F  | -0.190 | ALPHA | -0.028 | THOLE | 1.450 |
| ATOM F2    | F  | -0.190 | ALPHA | -0.028 | THOLE | 1.450 |
| ATOM S     | S6 | 0.998  | ALPHA | -2.658 | THOLE | 1.128 |
| ATOM O     | O  | -0.353 | ALPHA | -0.271 | THOLE | 1.471 |
| ATOM LPAO  | LP | -0.145 |       |        |       |       |
| ATOM LPBO  | LP | -0.100 |       |        |       |       |
| ATOM O1    | O  | -0.353 | ALPHA | -0.271 | THOLE | 1.471 |
| ATOM LPAO1 | LP | -0.145 |       |        |       |       |
| ATOM LPBO1 | LP | -0.100 |       |        |       |       |
| ATOM O2    | O  | -0.353 | ALPHA | -0.271 | THOLE | 1.471 |
| ATOM LPAO2 | LP | -0.145 |       |        |       |       |
| ATOM LPBO2 | LP | -0.100 |       |        |       |       |

|        |    |  |   |      |        |
|--------|----|--|---|------|--------|
| BOND C | F  |  | ! | DIST | 1.3239 |
| BOND C | F1 |  | ! | DIST | 1.3237 |

```

BOND C      F2                ! DIST      1.3237
BOND C      S                 ! DIST      1.8184
BOND S      O                 ! DIST      1.4431
BOND S      O1                ! DIST      1.4425
BOND S      O2                ! DIST      1.4425
BOND        O      LPAO        O      LPBO
BOND        O1     LPAO1       O1     LPBO1
BOND        O2     LPAO2       O2     LPBO2

LONEPAIR relative LPAO  O      S      C      distance 0.35 angle 110.00 dihe
0.00
LONEPAIR relative LPBO  O      S      C      distance 0.35 angle 110.00 dihe 180.00
ANISOTROPY      O      S      LPAO      LPBO  A11  0.56750 A22  0.37401
LONEPAIR relative LPAO1 O1     S      C      distance 0.35 angle 110.00 dihe
0.00
LONEPAIR relative LPBO1 O1     S      C      distance 0.35 angle 110.00 dihe 180.00
ANISOTROPY      O1     S      LPAO1     LPBO1  A11  0.56750 A22  0.37401
LONEPAIR relative LPAO2 O2     S      C      distance 0.35 angle 110.00 dihe
0.00
LONEPAIR relative LPBO2 O2     S      C      distance 0.35 angle 110.00 dihe 180.00
ANISOTROPY      O2     S      LPAO2     LPBO2  A11  0.56750 A22  0.37401

ANGL C      S      O                ! ANGLE     102.6274
ANGL C      S      O1               ! ANGLE     102.6487
ANGL C      S      O2               ! ANGLE     102.6487
ANGL F      C      F1               ! ANGLE     107.1013
ANGL F      C      F2               ! ANGLE     107.1013
ANGL F      C      S                 ! ANGLE     111.7239
ANGL F1     C      F2               ! ANGLE     107.1326
ANGL F1     C      S                 ! ANGLE     111.7459
ANGL F2     C      S                 ! ANGLE     111.7459
ANGL O      S      O1               ! ANGLE     115.3458
ANGL O      S      O2               ! ANGLE     115.3458
ANGL O1     S      O2               ! ANGLE     115.3600

DIHE F      C      S      O        ! DIHE      -180.0000
DIHE F1     C      S      O        ! DIHE      -60.0184
DIHE F2     C      S      O        ! DIHE       60.0184
DIHE F      C      S      O1       ! DIHE      -60.0079
DIHE F1     C      S      O1       ! DIHE       59.9737
DIHE F2     C      S      O1       ! DIHE     -179.9895
DIHE F      C      S      O2       ! DIHE       60.0079
DIHE F1     C      S      O2       ! DIHE     179.9895
DIHE F2     C      S      O2       ! DIHE     -59.9737

=====
!DCA
=====
RESI DCA  -1.000
GROUP
ATOM N      N1      -0.611  ALPHA  -0.405  THOLE  1.211
ATOM C      CG       0.419  ALPHA  -1.042  THOLE  1.298
ATOM N1     NE      -0.616  ALPHA  -0.983  THOLE  1.337
ATOM C1     CG       0.419  ALPHA  -1.042  THOLE  1.298
ATOM N2     N1      -0.611  ALPHA  -0.405  THOLE  1.211

BOND N      C                ! DIST      1.1508
BOND C      N1               ! DIST      1.3125
BOND N1     C1               ! DIST      1.3125
BOND C1     N2               ! DIST      1.1508

```

|         |    |    |    |         |           |
|---------|----|----|----|---------|-----------|
| ANGL N  | C  | N1 |    | ! ANGLE | 175.1727  |
| ANGL C  | N1 | C1 |    | ! ANGLE | 118.5067  |
| ANGL N1 | C1 | N2 |    | ! ANGLE | 175.1727  |
| DIHE N  | C  | N1 | C1 | ! DIHE  | -180.0000 |
| DIHE C  | N1 | C1 | N2 | ! DIHE  | -179.9999 |

---



---

!OAC

---



---

RESI OAC -1.000

GROUP

|            |    |        |       |        |       |       |
|------------|----|--------|-------|--------|-------|-------|
| ATOM C     | C3 | -0.426 | ALPHA | -1.837 | THOLE | 1.104 |
| ATOM H     | HC | 0.058  |       |        |       |       |
| ATOM H1    | HC | 0.058  |       |        |       |       |
| ATOM H2    | HC | 0.058  |       |        |       |       |
| ATOM C1    | C  | 0.438  | ALPHA | -1.243 | THOLE | 0.979 |
| ATOM O     | OA | -0.317 | ALPHA | -0.322 | THOLE | 1.020 |
| ATOM LPAO  | LP | -0.110 |       |        |       |       |
| ATOM LPBO  | LP | -0.148 |       |        |       |       |
| ATOM O1    | OA | -0.317 | ALPHA | -0.322 | THOLE | 1.020 |
| ATOM LPAO1 | LP | -0.100 |       |        |       |       |
| ATOM LPBO1 | LP | -0.194 |       |        |       |       |

|         |    |       |        |        |
|---------|----|-------|--------|--------|
| BOND C  | H  |       | ! DIST | 1.0885 |
| BOND C  | H1 |       | ! DIST | 1.0890 |
| BOND C  | H2 |       | ! DIST | 1.0858 |
| BOND C  | C1 |       | ! DIST | 1.5538 |
| BOND C1 | O  |       | ! DIST | 1.2333 |
| BOND C1 | O1 |       | ! DIST | 1.2354 |
| BOND    | O  | LPAO  | O      | LPBO   |
| BOND    | O1 | LPAO1 | O1     | LPBO1  |

|            |          |       |    |       |       |          |         |       |         |      |        |
|------------|----------|-------|----|-------|-------|----------|---------|-------|---------|------|--------|
| LONEPAIR   | relative | LPAO  | O  | C1    | C     | distance | 0.35    | angle | 110.00  | dihe |        |
|            |          |       |    |       |       |          |         |       |         |      | 0.00   |
| LONEPAIR   | relative | LPBO  | O  | C1    | C     | distance | 0.35    | angle | 110.00  | dihe | 180.00 |
| ANISOTROPY |          | O     | C1 | LPAO  | LPBO  | A11      | 0.62676 | A22   | 1.00186 |      |        |
| LONEPAIR   | relative | LPAO1 | O1 | C1    | C     | distance | 0.35    | angle | 110.00  | dihe |        |
|            |          |       |    |       |       |          |         |       |         |      | 0.00   |
| LONEPAIR   | relative | LPBO1 | O1 | C1    | C     | distance | 0.35    | angle | 110.00  | dihe | 180.00 |
| ANISOTROPY |          | O1    | C1 | LPAO1 | LPBO1 | A11      | 0.62676 | A22   | 1.00186 |      |        |

|         |    |    |  |         |          |
|---------|----|----|--|---------|----------|
| ANGL C  | C1 | O  |  | ! ANGLE | 116.0140 |
| ANGL C  | C1 | O1 |  | ! ANGLE | 114.5436 |
| ANGL H  | C  | H1 |  | ! ANGLE | 106.6972 |
| ANGL H  | C  | H2 |  | ! ANGLE | 109.2573 |
| ANGL H  | C  | C1 |  | ! ANGLE | 109.6829 |
| ANGL H1 | C  | H2 |  | ! ANGLE | 109.2436 |
| ANGL H1 | C  | C1 |  | ! ANGLE | 109.7254 |
| ANGL H2 | C  | C1 |  | ! ANGLE | 112.0849 |
| ANGL O  | C1 | O1 |  | ! ANGLE | 129.4425 |

|         |   |    |    |        |           |
|---------|---|----|----|--------|-----------|
| DIHE H  | C | C1 | O  | ! DIHE | -121.4873 |
| DIHE H1 | C | C1 | O  | ! DIHE | 121.6133  |
| DIHE H2 | C | C1 | O  | ! DIHE | 0.0569    |
| DIHE H  | C | C1 | O1 | ! DIHE | 58.5127   |
| DIHE H1 | C | C1 | O1 | ! DIHE | -58.3867  |
| DIHE H2 | C | C1 | O1 | ! DIHE | -179.9431 |

|        |   |    |    |  |  |
|--------|---|----|----|--|--|
| IMPH C | O | C1 | O1 |  |  |
|--------|---|----|----|--|--|



```

=====
!WATER
=====
RESI SWM4          0.000
GROUP
ATOM   OH2   ODW      0.00000 ALPHA -0.97825258 THOLE 1.3
ATOM   OM    LP       -1.11466
ATOM   H1    HDW      0.55733
ATOM   H2    HDW      0.55733

BOND   OH2   H1
BOND   OH2   H2
BOND   OH2   OM
BOND   H1    H2 ! for SHAKE

ANGLE  H1     OH2 H2

LONEPAIR bisector OM OH2 H1 H2 distance 0.24034492 angle 0.0 dihe 0.0
IC   H1  OH2  H2  H1  0.9572 104.52  0.00  37.74  1.5139
IC   H1  OM   *OH2 H2  0.9572  52.26 180.00  52.26  0.9572
IC   H2  H1   OH2  OM  1.5139  37.74  0.01  52.26  0.24034492
END

```

### 3.2 Parameters

\* FORCE FIELD PARAMETER FILE .

\*

```

=====
ATOMS
=====
MASS   1 h1      1.008000
MASS   2 h4      1.008000
MASS   3 h5      1.008000
MASS   4 hc      1.008000
MASS   6 c3     12.010000
MASS   7 cc     12.010000
MASS   8 cd     12.010000
MASS   9 cg     12.010000
MASS  10 o      16.000000
MASS  13 n1     14.010000
MASS  14 na     14.010000
MASS  15 ne     14.010000
MASS  16 f      19.000000
MASS  18 s6     32.060000
MASS  19 c      12.010000
MASS  20 oa     16.000000
MASS  51 ODW    15.999400 ! water oxygen
MASS  52 HDW    1.008000 ! water hydrogen
MASS  60 LP     0.000000 ! general lone pair
MASS  61 DRUD   0.000000 ! drude particle

```

```

=====
BONDS
=====
!
! EMIM
!
C3 H1   335.90  1.093

```

|          |        |            |                                         |  |
|----------|--------|------------|-----------------------------------------|--|
| C3 NA    | 334.70 | 1.456      |                                         |  |
| CC NA    | 438.80 | 1.371      |                                         |  |
| CD NA    | 438.80 | 1.371      |                                         |  |
| CC H5    | 356.00 | 1.079      |                                         |  |
| CC CD    | 504.00 | 1.371      |                                         |  |
| CC H4    | 350.10 | 1.083      |                                         |  |
| CD H4    | 350.10 | 1.083      |                                         |  |
| C3 C3    | 303.10 | 1.535      |                                         |  |
| C3 HC    | 337.30 | 1.092      |                                         |  |
| !        |        |            |                                         |  |
| ! TRIF   |        |            |                                         |  |
| !        |        |            |                                         |  |
| C3 F     | 363.80 | 1.344      |                                         |  |
| C3 S6    | 254.00 | 1.774      |                                         |  |
| O S6     | 541.10 | 1.436      |                                         |  |
| O LP     | 0.00   | 0.000      |                                         |  |
| !        |        |            |                                         |  |
| ! DCA    |        |            |                                         |  |
| !        |        |            |                                         |  |
| CG NE    | 509.50 | 1.326      |                                         |  |
| CG N1    | 994.70 | 1.143      |                                         |  |
| !        |        |            |                                         |  |
| ! OAc    |        |            |                                         |  |
| !        |        |            |                                         |  |
| !C3 HC   | 337.30 | 1.092      | !already defined by emim                |  |
| C C3     | 328.30 | 1.508      |                                         |  |
| C OA     | 648.00 | 1.214      |                                         |  |
| OA LP    | 0.00   | 0.000      |                                         |  |
| !        |        |            |                                         |  |
| ! Drudes |        |            |                                         |  |
| !        |        |            |                                         |  |
| C DRUD   | 500.00 | 0.000      |                                         |  |
| C3 DRUD  | 500.00 | 0.000      |                                         |  |
| CC DRUD  | 500.00 | 0.000      |                                         |  |
| CD DRUD  | 500.00 | 0.000      |                                         |  |
| CG DRUD  | 500.00 | 0.000      |                                         |  |
| O DRUD   | 500.00 | 0.000      |                                         |  |
| OA DRUD  | 500.00 | 0.000      |                                         |  |
| ODW DRUD | 500.00 | 0.000      |                                         |  |
| NA DRUD  | 500.00 | 0.000      |                                         |  |
| N1 DRUD  | 500.00 | 0.000      |                                         |  |
| NE DRUD  | 500.00 | 0.000      |                                         |  |
| F DRUD   | 500.00 | 0.000      |                                         |  |
| S6 DRUD  | 500.00 | 0.000      |                                         |  |
| !        |        |            |                                         |  |
| ! WATER  |        |            |                                         |  |
| !        |        |            |                                         |  |
| ODW HDW  | 450.00 | 0.9572     | ! SWM4, SWM4-NDP water , Guillaume 2005 |  |
| ODW LP   | 0.00   | 0.24034492 | ! SWM4, SWM4-NDP water , Guillaume 2005 |  |
| HDW HDW  | 0.00   | 1.5139     | ! SWM4, SWM4-NDP water , Guillaume 2005 |  |

---



---

ANGLES

---



---

!

!EMIM

!

|          |        |         |                    |  |
|----------|--------|---------|--------------------|--|
| C3 NA CC | 62.560 | 125.090 |                    |  |
| H1 C3 H1 | 39.180 | 109.550 |                    |  |
| H1 C3 NA | 49.900 | 109.450 |                    |  |
| NA CC NA | 73.650 | 109.330 | ! SAME AS NA C2 NA |  |

|          |        |         |
|----------|--------|---------|
| NA CC H5 | 49.760 | 122.100 |
| NA CD CC | 72.910 | 109.420 |
| NA CD H4 | 50.220 | 119.660 |
| NA C3 C3 | 65.730 | 112.810 |
| CC NA CD | 63.880 | 128.010 |
| CC NA CC | 68.940 | 109.900 |
| NA CC CD | 72.910 | 109.420 |
| NA CC H4 | 50.220 | 119.660 |
| CC CD H4 | 47.190 | 129.110 |
| CD NA C3 | 62.560 | 125.090 |
| CD CC H4 | 47.190 | 129.110 |
| C3 C3 HC | 46.370 | 110.050 |
| H1 C3 C3 | 46.360 | 110.070 |
| HC C3 HC | 39.430 | 108.350 |

!

! TRIF

!

|         |        |         |
|---------|--------|---------|
| C3 S6 O | 41.660 | 108.320 |
| F C3 F  | 71.260 | 107.160 |
| F C3 S6 | 81.220 | 109.670 |
| O S6 O  | 46.660 | 119.730 |

!

! DCA

!

|          |        |         |
|----------|--------|---------|
| CG NE CG | 66.000 | 140.000 |
| NE CG N1 | 65.040 | 174.070 |

!

! OAc

!

|           |        |         |
|-----------|--------|---------|
| C3 C OA   | 68.030 | 123.110 |
| !HC C3 HC | 39.430 | 108.350 |
| HC C3 C   | 47.200 | 109.680 |
| OA C OA   | 78.170 | 130.380 |

already defined by emim

!

! H2O

!

|             |      |        |
|-------------|------|--------|
| HDW ODW HDW | 0.00 | 104.52 |
| LP ODW HDW  | 0.00 | 000.00 |
| ODW HDW HDW | 0.00 | 000.00 |

---



---

## DIHEDRALS

---



---

!

!EMIM

!

|             |       |   |       |
|-------------|-------|---|-------|
| X C3 NA X   | 0.000 | 2 | 0.0   |
| X CC NA X   | 1.700 | 2 | 180.0 |
| X CD NA X   | 1.700 | 2 | 180.0 |
| X CC CD X   | 4.000 | 2 | 180.0 |
| X C3 C3 X   | 0.156 | 3 | 0.0   |
| CC NA C3 C3 | 0.027 | 1 | 0.0   |
| CC NA C3 C3 | 0.232 | 2 | 180.0 |
| CC NA C3 C3 | 0.314 | 3 | 180.0 |
| CC NA C3 C3 | 0.033 | 4 | 180.0 |

```

CC NA C C3      0.0255      6      0.0

!
! TRIF
!
F C3 S6 O      0.144      3      0.0

!
! DCA
!
X CG NE X      0.000      2      180.0
CG NE CG N1    0.000      2      180.0      ! SAME AS X C1 NE X

!
! OAc
!
X C C3 X      0.000      2      180.0
HC C3 C OA    0.800      1      0.0
HC C3 C OA    0.080      3      180.0

```

---



---

IMPROPERS

---



---

```

!
!EMIM
!
C3 CC NA CD    1.100      2      180.0      ! USING DEFAULT VALUE
H5 NA CC NA    1.100      2      180.0      ! USING DEFAULT VALUE
C3 CC NA CC    1.100      2      180.0      ! USING DEFAULT VALUE
CD H4 CC NA    1.100      2      180.0      ! USING DEFAULT VALUE
CC H4 CD NA    1.100      2      180.0      ! USING DEFAULT VALUE

!
! TRIF
!
!
! DCA
!
!
! OAc
!
X OA C OA      1.100      2      180.0

```

---



---

NONBONDED

---



---

```

!
!          EMIN      RMIN/2          EMIN/2      RMIN (FOR 1-4'S)
!          (KCAL/MOL)      (A)
!
!old values (unscaled):
!
!C3      0.00      -0.1094      1.9080      0.00      -0.0547      1.9080
!H1      0.00      -0.0157      1.3870      0.00      -0.00775     1.3870
!NA      0.00      -0.1700      1.8240      0.00      -0.0850      1.8240
!CC      0.00      -0.0860      1.9080      0.00      -0.0430      1.9080
!CD      0.00      -0.0860      1.9080      0.00      -0.0430      1.9080
!H5      0.00      -0.0150      1.3590      0.00      -0.0075      1.3590
!H4      0.00      -0.0150      1.4090      0.00      -0.0075      1.4090

```

```

!HC      0.00  -0.0157  1.4870      0.00  -0.00775  1.4870
!
!new values , scaled via lambda=0.4
C3      0.00  -0.0741  1.9080      0.00  -0.0371  1.9080
NA      0.00  -0.1427  1.8240      0.00  -0.0713  1.8240
CC      0.00  -0.0602  1.9080      0.00  -0.0301  1.9080
CD      0.00  -0.0600  1.9080      0.00  -0.0300  1.9080
H1      0.00  -0.0157  1.3870      0.00  -0.00775  1.3870
H5      0.00  -0.0150  1.3590      0.00  -0.0075  1.3590
H4      0.00  -0.0150  1.4090      0.00  -0.0075  1.4090
HC      0.00  -0.0157  1.4870      0.00  -0.00775  1.4870

!
! TRIF
!
!old values (unscaled):
!
!S6      0.00  -0.2500  2.0000      0.00  -0.1250  2.00
!F      0.00  -0.0610  1.7500      0.00  -0.0305  1.7500
!O      0.00  -0.2100  1.6612      0.00  -0.1050  1.6612
!
!new values , scaled via lambda=0.4
S6      0.00  -0.1000  2.0000      0.00  -0.0500  2.00
F      0.00  -0.0607  1.7500      0.00  -0.0304  1.7500
O      0.00  -0.2005  1.6612      0.00  -0.1003  1.6612

!
! dca
!
!old values (unscaled):
!
!N1      0.00  -0.1700  1.8240      0.00  -0.0850  1.8240
!NE      0.00  -0.1700  1.8240      0.00  -0.0850  1.8240
!CG      0.00  -0.2100  1.9080      0.00  -0.1050  1.9080
!
!new values , scaled via lambda=0.4
N1      0.00  -0.1584  1.8240      0.00  -0.0792  1.8240
NE      0.00  -0.1399  1.8240      0.00  -0.0699  1.8240
CG      0.00  -0.1703  1.9080      0.00  -0.0851  1.9080

!
! OAc
!
C      0.00  -0.0860  1.9080      0.00  -0.0430  1.9080
OA     0.00  -0.2100  1.6612      0.00  -0.1050  1.6612
!
! Wildcard for Drudes and dummy atom
!
DRUD   0.0  -0.0000  0.0000      0.00  -0.00  0.00
LP     0.0  -0.0000  0.0000      0.00  -0.00  0.00
!
! WATER
!
! SWM4, SWM4-NDP water , GL, 2005
HDW    0.0  -0.0000  0.0000      0.00  -0.0000  0.00

```

```
! SWM4, SWM4-NDP water, GL, 2005
ODW      0.0   -0.2109   1.7869      0.00   -0.10545   1.7869
```

END

### 3.3 Dynamics

```
* emim_trif_1000 polarizable
*
```

---

---

```
! Topology and parameters
```

---

---

```
open read card unit 10 name ./il_pol.rtf
read  rtf card unit 10
close unit 10
```

```
open read card unit 20 name ./il_pol_04.prm
read  para card unit 20
close unit 20
```

---

---

```
! sequence, coordinates and simulation box
```

---

---

```
read SEQUENCE EMIM 1000
generate EMIM SETUP WARN DRUDE DMASS 0.2
```

```
read SEQUENCE DCA 1000
generate DCA SETUP WARN DRUDE DMASS 0.2
```

```
open read unit 10 card name structures/npt_04.crd
read  coor unit 10 card
close unit 10
```

```
set xtl = 64.27
calc xtl2 = @xtl/2
set grid = 72
```

```
crystal DEFINE cubic @xtl @xtl @xtl 90.0 90.0 90.0
crystal BUILD CUTOFF @xtl2 noperations 0
image BYRESIDUE SELECT ALL END
```

```
energy  bycb atom vatom cdiel ewal pmew vswitch -
        ctonnb          10  -
        ctofnb          11  -
        cutnb           14  -
        cutim           14  -
        kappa            0.41 -
        fftx             @grid -
        ffty             @grid -
        fftz             @grid -
        spli order       6  -
        qcor             0  -
        wmin             1.5 -
        inbfrq           -1  -
        imgfrq           -1
```

```
shake BONH PARAM TOL 1.0e-9 NOFAST -
```

```
SELECT ( .not. TYPE D* ) END -  
SELECT ( .not. TYPE D* ) END
```

---

---

```
! Temperature control - - - N V T - - -
```

---

---

```
if @?temp EQ 0 SET temp = 260.
```

```
tpcontrol N THER 2 NSTEP 20 -  
  THER 1 TAU 0.1 TREF @temp SELECT .NOT. TYPE D* END -  
  THER 2 TAU 0.005 TREF 1.00 SELECT TYPE D* END -
```

---

---

```
! Dynamics
```

---

---

```
if @?nstep EQ 0 set nstep = 200000  
if @?dt EQ 0 set dt = 0.0005 ! in ps
```

```
if @?index EQ 0 set index = 1
```

```
if @index EQ 1 then  
  set starter = START  
  set iunrea = -1
```

```
else  
  set starter = RESTART  
  set iunrea = 10
```

```
  calc prev = @index - 1  
  open unit 10 form name traj_04/emim_dca_pol_@prev.rst  
endif
```

```
! current restart file  
open unit 15 form name traj_04/emim_dca_pol_@index.rst
```

```
! current trajectory file  
open unit 20 file name traj_04/emim_dca_pol_@index.dcd
```

```
! GPU support  
cuda init  
cuda use  
energy
```

```
! trajectory production  
dyna VV2 @starter -  
  ISEED 43 36 783 28 -  
  NSTEP @nstep -  
  TIMESTEP @dt -  
  IPRFRQ 1000 -  
  IMGFRQ -1 -  
  INBFRQ -1 -  
  NTRFRQ 5000 -  
  NPRINT 100 -  
  NSAVC 50 -  
  NSAVV -1 -  
  IUNREA @iunrea -  
  IUNWRI 15 -  
  IUNCRD 20 -  
  IUNVEL -1 -  
  FIRSTT @temp
```

stop



## References

- [1] A. K. Doolittle, *J. Appl. Phys.*, 1951, **22**, 1471–1475.
- [2] M. Petrowsky and R. Frech, *J. Phys. Chem. B*, 2009, **113**, 16118–16123.
- [3] M. Petrowsky, A. M. Fleshman and R. Frech, *J. Phys. Chem. B*, 2013, **117**, 2971–2978.
- [4] K. R. Harris, *J. Chem. Eng. Data*, 2020, **65**, 804–813.
- [5] C. Schreiner, S. Zugmann, R. Hartl and H. J. Gores, *J. Chem. Eng. Data*, 2010, **55**, 1784–1788.
- [6] K. R. Harris and M. Kanakubo, *J. Chem. Eng. Data*, 2016, **61**, 2399–2411.
- [7] P. Honegger, V. Overbeck, A. Strate, A. Appelhagen, M. Sappl, E. Heid, C. Schröder, R. Ludwig and O. Steinhauser, *J. Phys. Chem. Lett.*, 2020, **11**, 2165–2170.
- [8] E. Heid, B. Docampo-Alvarez, L. M. Varela, K. Prosenz, O. Steinhauser and C. Schröder, *Phys. Chem. Chem. Phys.*, 2018, **20**, 15106.
